# Supplementary material for: A highly reduced graphene oxide/ZrOx–MnCO3 or –Mn2O3 nanocomposite as an efficient catalyst for selective aerial oxidation of benzylic alcohols
Source: Royal Society of Chemistry journal article supplement (doi:10.1039/c7ra11569e), 2017-01-01
Supplement: c7ra11569e1.pdf [file c7ra11569e1.pdf]

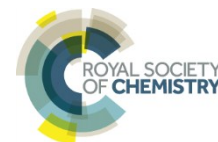

## RSC Advances

### ARTICLE

## Highly reduced graphene oxide /ZrO<sub>x</sub>– MnCO<sub>3</sub> or –Mn<sub>2</sub>O<sub>3</sub> nanocomposite as an efficient catalysts for selective aerial oxidation of benzylic alcohols

Mohamed E. Assal,<sup>a</sup> Mohammed Rafi Shaik,<sup>a</sup> Mufsir Kuniyil,<sup>a</sup> Mujeeb Khan,<sup>a</sup> Abdulrahman Al-Warthan,<sup>a</sup> Mohammed Rafiq H. Siddiqui,<sup>a</sup> Sohail M. A. Khan,<sup>b</sup> Wolfgang Tremel,<sup>c</sup> Muhammad Nawaz Tahir\*<sup>c,d</sup> and Syed Farooq Adil\*<sup>a</sup>

<sup>a</sup>Department of Chemistry, College of Science, King Saud University, P.O. Box 2455, Riyadh 11451, Kingdom of Saudi Arabia. E-mail: sfadil@ksu.edu.sa

<sup>b</sup>Department of Mechanical and Industrial Engineering, Ryerson University, Toronto, Ontario M5B 2K3, Canada.

<sup>c</sup>Institute of Inorganic and Analytical Chemistry Johannes Gutenberg-University of Mainz, Germany. E-mail: [tahir@uni-mainz.de](mailto:tahir@uni-mainz.de)

<sup>d</sup>Chemistry Department, King Fahd University of Petroleum and Materials, Dhahran 31261, Kingdom of Saudi Arabia

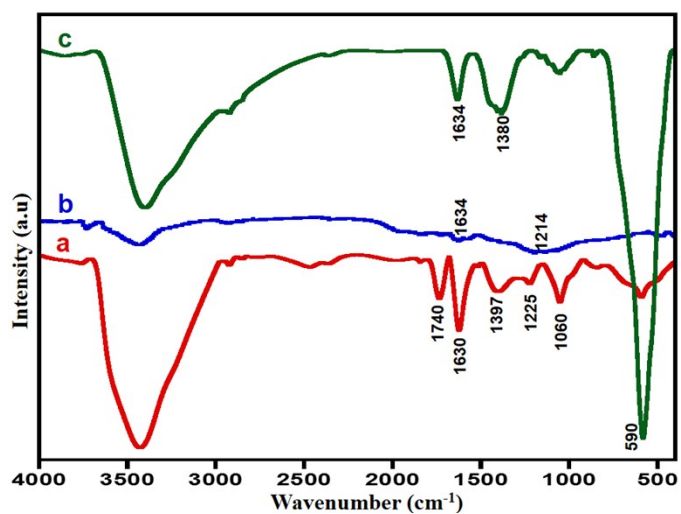

Fig. S1 FTIR spectra of (a) GO, (b) HRG, and (c) ZrO<sub>x</sub>(1%)–MnCO<sub>3</sub>/(1%)HRG.

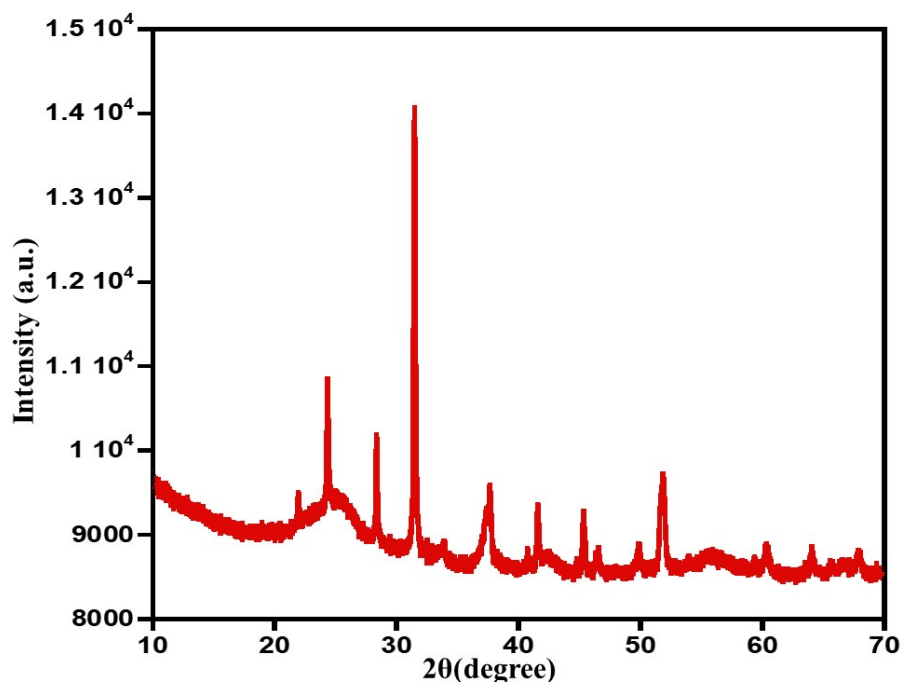

Fig. S2 XRD pattern of the ZrO<sub>x</sub>(1%)–MnCO<sub>3</sub>/(1%)HRG nanocomposite after using in the oxidation of benzyl alcohol reaction.

**Table S1** Elemental composition of the catalyst  $\text{ZrO}_x(1\%)\text{-MnCO}_3$  and  $\text{ZrO}_x(1\%)\text{-MnCO}_3/(1\%)\text{HRG}$ .

| Compound                                          | Element Mass (%) |       |       |      |
|---------------------------------------------------|------------------|-------|-------|------|
|                                                   | C                | O     | Mn    | Zr   |
| $\text{ZrO}_x(1\%)\text{-MnCO}_3$                 | 29.97            | 15.84 | 53.24 | 0.95 |
| $\text{ZrO}_x(1\%)\text{-MnCO}_3/(1\%)\text{HRG}$ | 35.07            | 18.38 | 45.3  | 1.25 |

**Table S2** Catalytic oxidation of benzyl alcohol by molecular oxygen.

| Entry | Catalyst                                          | Conv. (%) | Sp. activity ( $\text{mmol.g}^{-1}.\text{h}^{-1}$ ) | Sel. (%) |
|-------|---------------------------------------------------|-----------|-----------------------------------------------------|----------|
| 1     | HRG                                               | 2.97      | 1.32                                                | >99      |
| 2     | $\text{ZrO}_x(1\%)\text{-MnCO}_3$                 | 74.18     | 32.97                                               | >99      |
| 3     | $\text{ZrO}_x(1\%)\text{-MnCO}_3/(1\%)\text{HRG}$ | 100.0     | 44.44                                               | >99      |
| 4     | $\text{ZrO}_x(1\%)\text{-MnCO}_3/(3\%)\text{HRG}$ | 93.29     | 41.46                                               | >99      |
| 5     | $\text{ZrO}_x(1\%)\text{-MnCO}_3/(5\%)\text{HRG}$ | 84.14     | 37.40                                               | >99      |
| 6     | $\text{ZrO}_x(1\%)\text{-MnCO}_3/(7\%)\text{HRG}$ | 67.27     | 29.89                                               | >99      |

Reaction conditions: 2 mmol of benzyl alcohol, 300 mg of catalyst amount, calcination temperature at 300 °C, oxygen with rate 20  $\text{mL.min}^{-1}$ , reaction temperature at 100 °C, 10 mL of toluene, and 9 min of reaction time.

**Table S3** Influence of reaction temperature on the catalytic property.

| Entry | Reaction Temp. (°C) | Conv. (%) | Sp. activity ( $\text{mmol.g}^{-1}.\text{h}^{-1}$ ) | Sel. (%) |
|-------|---------------------|-----------|-----------------------------------------------------|----------|
| 1     | 20                  | 38.4      | 17.06                                               | >99      |
| 2     | 40                  | 53.5      | 23.79                                               | >99      |
| 3     | 60                  | 68.9      | 30.62                                               | >99      |
| 4     | 80                  | 84.7      | 37.65                                               | >99      |
| 5     | 100                 | 100.0     | 44.44                                               | >99      |

Reaction conditions: 2 mmol of benzyl alcohol, 300 mg of catalyst amount, calcination temperature at 300 °C, oxygen with rate 20  $\text{mL.min}^{-1}$ , 10 mL of toluene, and 9 min of reaction time.
